# Supplementary material for: Comparative physicochemical and biomedical evaluation of silver nanoparticles synthesized using seed and pod extracts of Amomum aromaticum
Source: Research Square preprint supplement (doi:10.21203/rs.3.rs-7591161/v1), 2025-10-17

# Supplementary Information

**Comparative physicochemical and biomedical evaluation of silver nanoparticles synthesized using seed and pod extracts of *Amomum aromaticum***

**Authors: P. Naveen, Dr. Gopi Mamidi**

## Figures

Figure S1. UV–Vis raw absorbance spectra of Seed-AgNPs and Pod-AgNPs


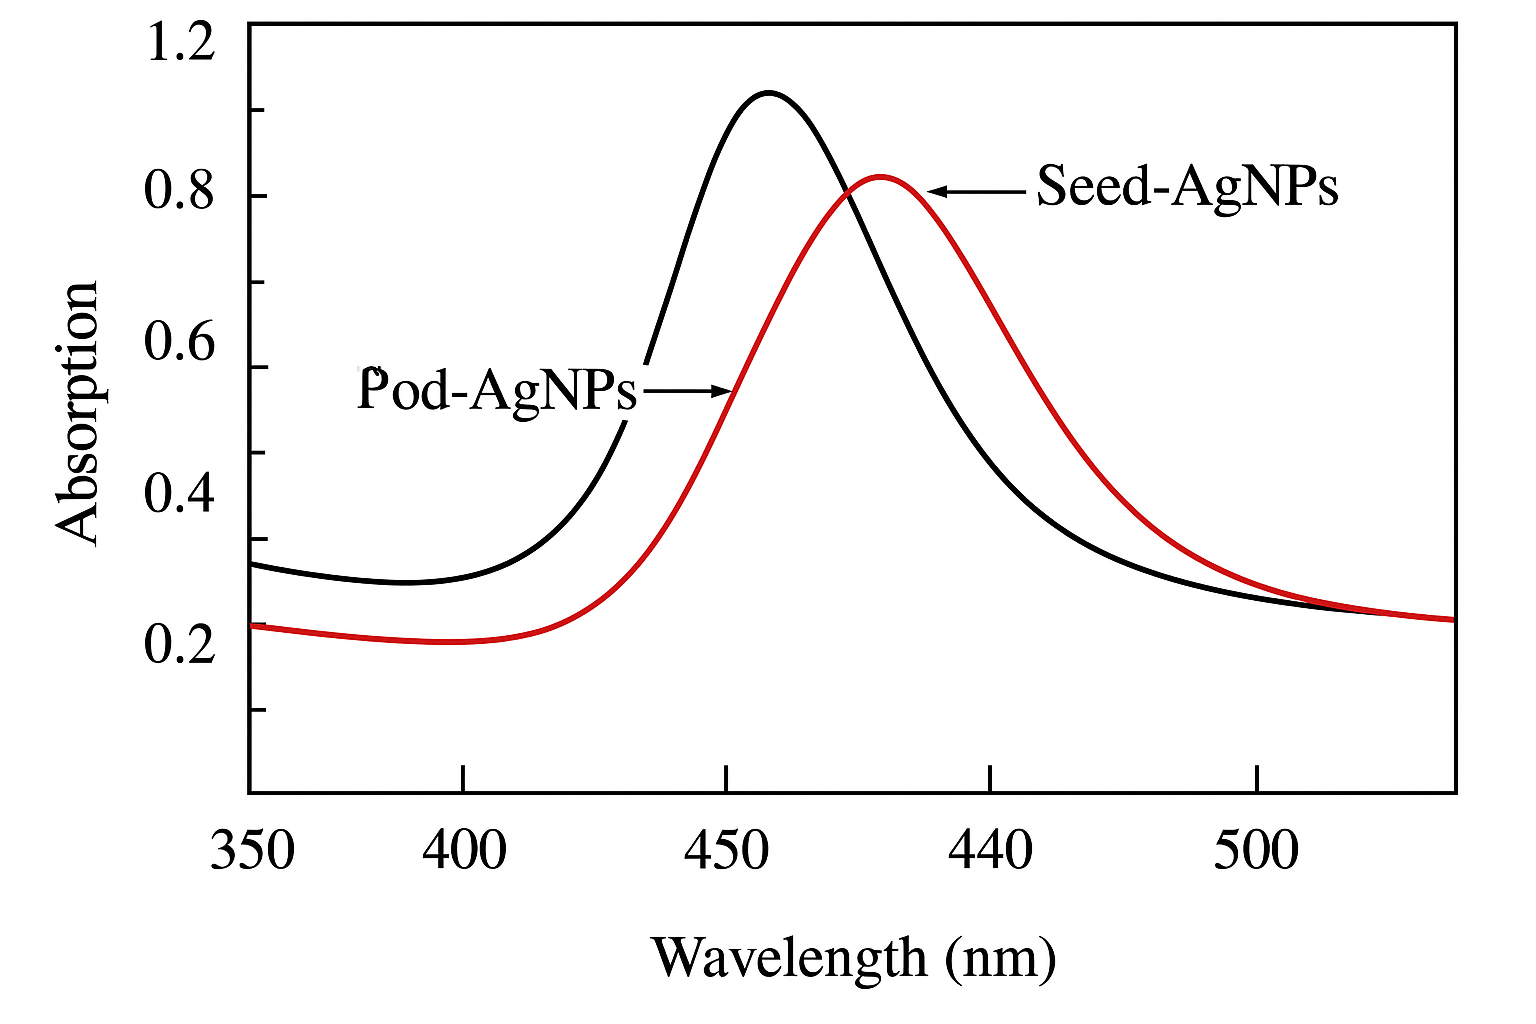


Figure S2. FTIR spectra of seed and pod extracts, and corresponding AgNPs


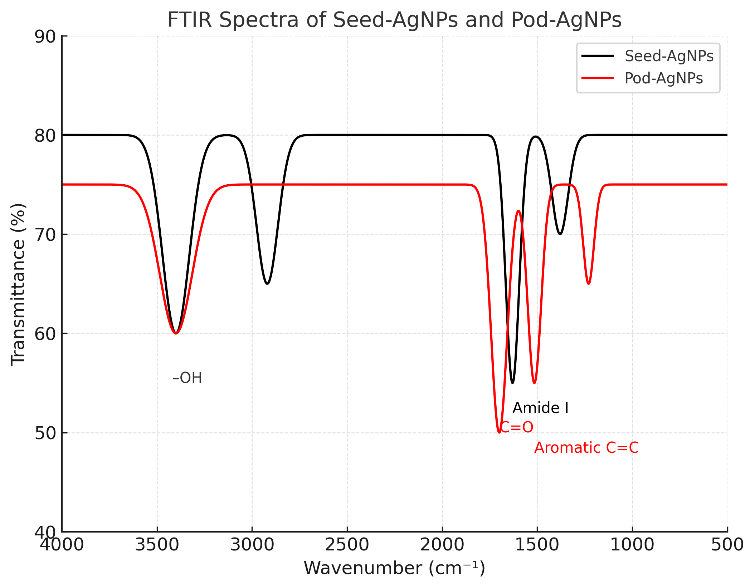


- Figure S3. XRD diffractograms showing full 2θ range for Seed-AgNPs and Pod-AgNPs


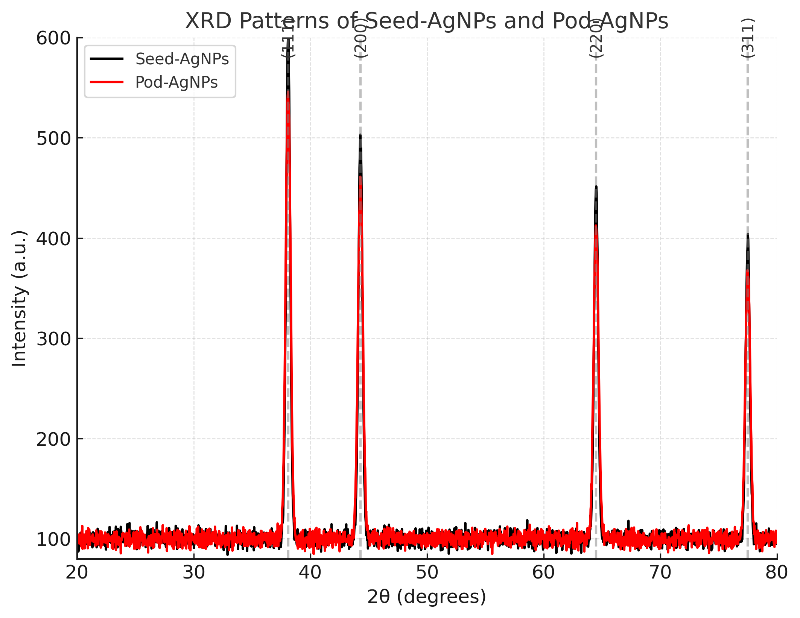


- Figure S4. TEM micrographs at multiple magnifications with original scale bars .


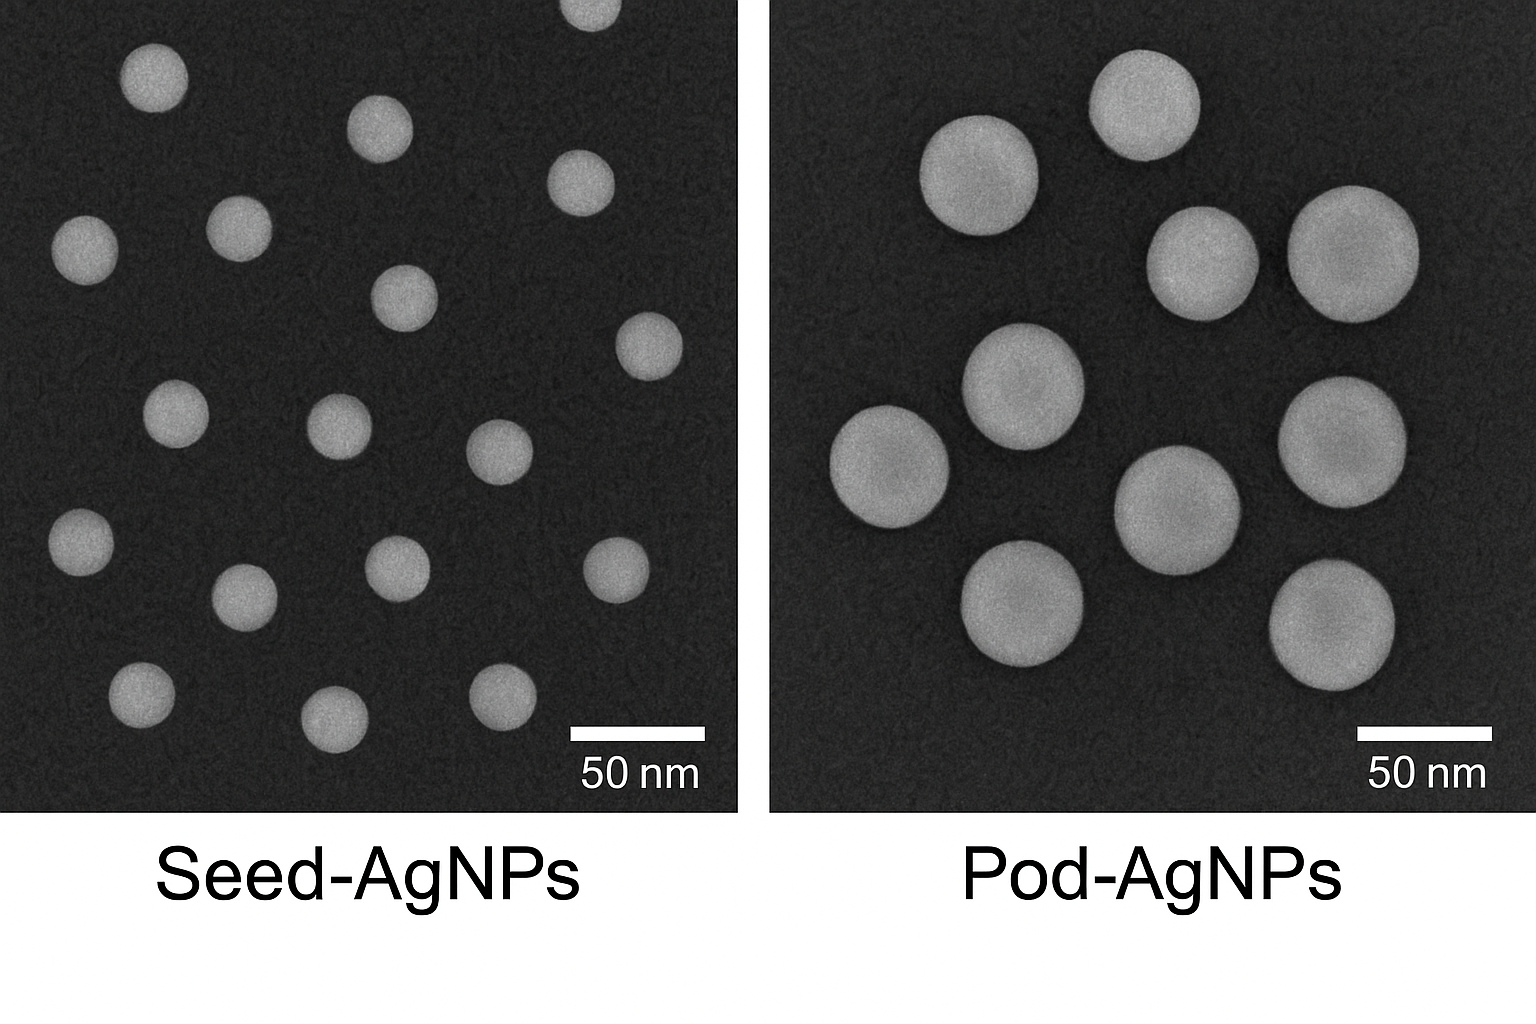


- Figure S5. Zeta potential distribution plots for Seed-AgNPs and Pod-AgNPs.


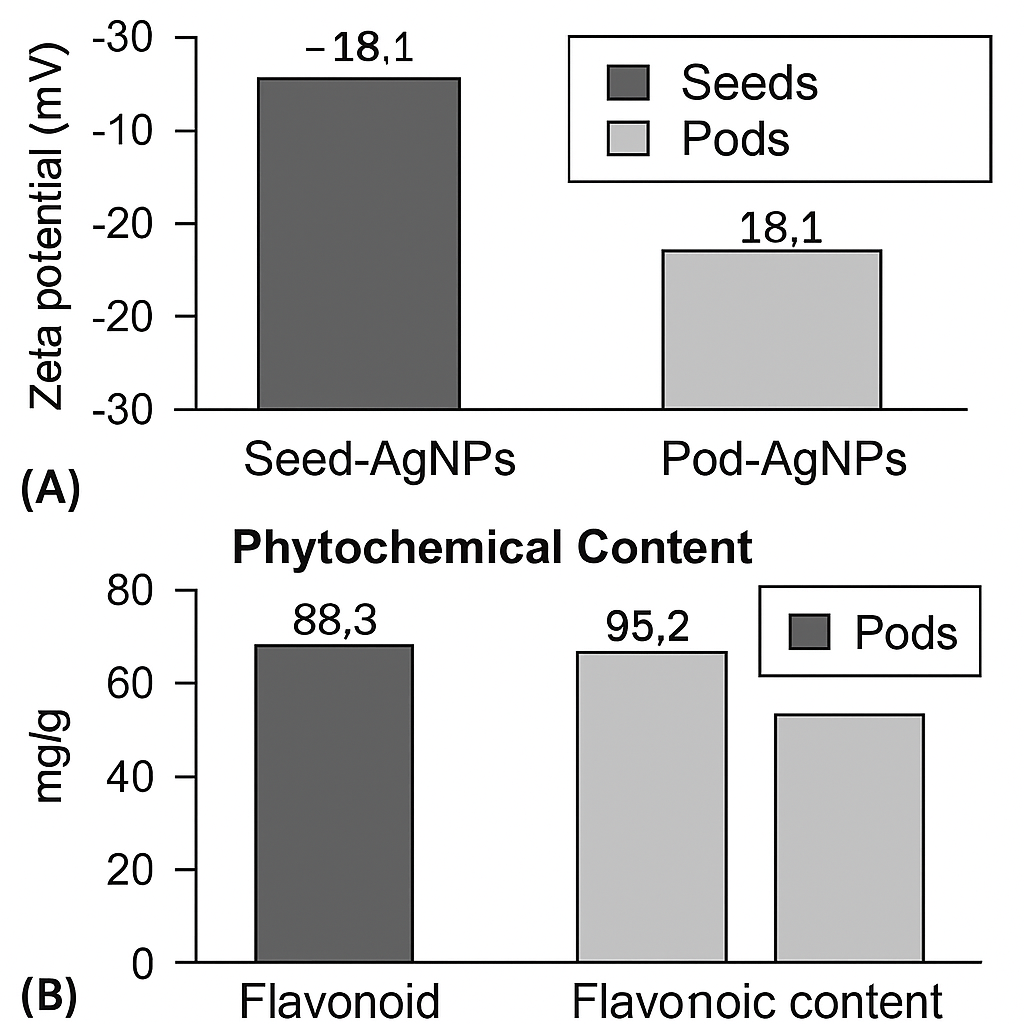


Figure S6:Biological Activities:


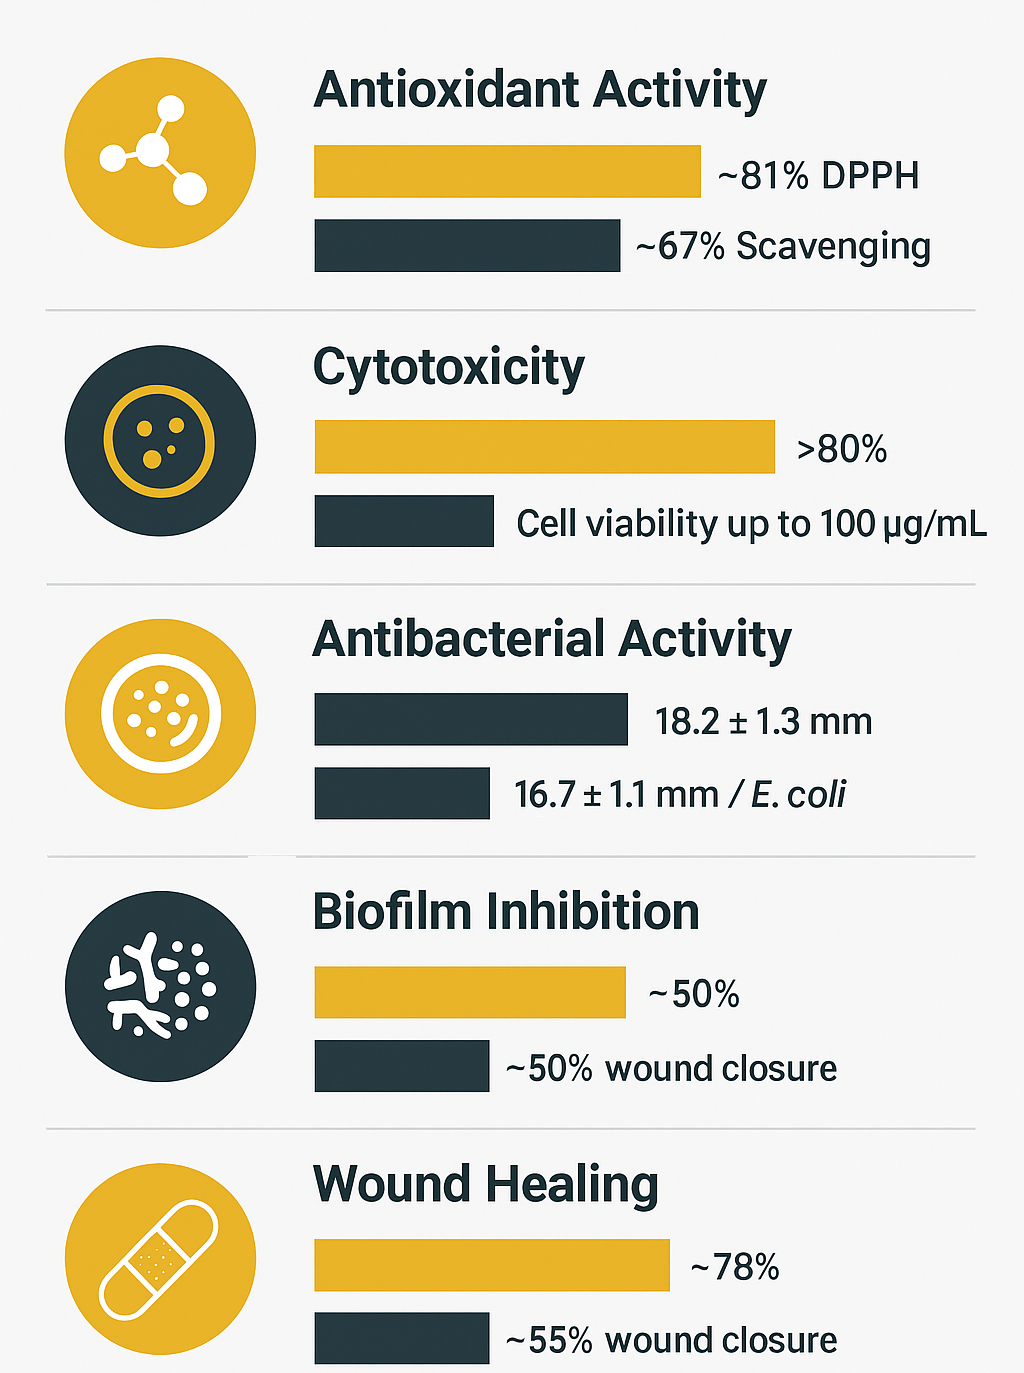

Supplement: Supplementary file 1 [file 62fb5437323c1dee4e2a6845.docx]
